# Supplementary material for: The Bio-Community Perl toolkit for microbial ecology
Source: PubMed Central journal article supplement (PMC4071200; doi:10.1093/bioinformatics/btu130), 2014-03-10
Supplement: supp_btu130_Bio-Community_supplementary.pdf [file supp_btu130_Bio-Community_supplementary.pdf]

## SUPPLEMENTARY MATERIAL

**Supplementary Table S1.**  $\alpha$  and  $\beta$  diversity metrics implemented in Bio-Community.

| Type     | Subtype                        | Name                                                                                                                                                                                                                                                                                          |
|----------|--------------------------------|-----------------------------------------------------------------------------------------------------------------------------------------------------------------------------------------------------------------------------------------------------------------------------------------------|
| $\alpha$ | Richness                       | Observed, Menhinick (Menhinick, 1964), Margalef (Margalef, 1957), Chao 1 (Chao, 1984), ACE (Chazdon <i>et al.</i> , 1998)                                                                                                                                                                     |
| $\alpha$ | Evenness                       | Buzas & Gibson (Buzas and Gibson, 1969), Heip (Heip, 1974), Shannon (Shannon and Weaver, 1963; Pielou, 1975), Simpson (Simpson, 1949; Pielou, 1975), Brillouin (Brillouin, 1962; Pielou, 1975), Hill $E_{2,1}$ (Hill, 1973), McIntosh (McIntosh, 1967; Pielou, 1975), Camargo (Camargo, 1993) |
| $\alpha$ | Dominance                      | Simpson (Simpson, 1949), Berger-Parker (Berger and Parker, 1970)                                                                                                                                                                                                                              |
| $\alpha$ | Index (composite)              | Shannon-Wiener (Shannon and Weaver, 1963), Simpson 1-D & 1/D (Simpson, 1949), Brillouin (Brillouin, 1962), Hill $N_{inf}$ (Hill, 1973), McIntosh (McIntosh, 1967)                                                                                                                             |
| $\beta$  | Qualitative (presence/absence) | Jaccard (Jaccard, 1901) and Sørensen (Sørensen, 1948; Whittaker, 1972)                                                                                                                                                                                                                        |
| $\beta$  | Quantitative                   | 1-norm (Manhattan distance), 2-norm (euclidean distance), infinity norm, Hellinger (Hellinger, 1909), Bray-Curtis (Bray and Curtis, 1957), Morisita-Horn (Horn, 1966) and MaxiPhi (Angly <i>et al.</i> , 2006)                                                                                |

**Supplementary Table S2.** Bio-Community supported input and output file formats.

| Name    | Format description                                    | Number of samples | Member information                            |
|---------|-------------------------------------------------------|-------------------|-----------------------------------------------|
| generic | Tab-delimited, site-by-species                        | Multiple          | Abundance and description                     |
| qiime   | Tab-delimited QIIME (Caporaso <i>et al.</i> , 2010)   | Multiple          | Abundance, ID and optional description        |
| gaas    | Tab-delimited GAAS (Angly <i>et al.</i> , 2009)       | Single            | Abundance, ID and description                 |
| unifrac | Tab-delimited UniFrac (Lozupone <i>et al.</i> , 2006) | Multiple          | Abundance and description                     |
| biom    | JSON-based format (McDonald <i>et al.</i> , 2012)     | Multiple          | Abundance, ID, description and other metadata |

**Supplementary Table S3.** Utility scripts included in Bio-Community.

| Name                         | Description                                                                 |
|------------------------------|-----------------------------------------------------------------------------|
| bc_clean_shrapnel            | Remove low-count, low-prevalence community members                          |
| bc_convert_files             | Merge or split community files and convert between different formats        |
| bc_correct_misassignments    | Try fixing incorrect taxonomic assignments, using a reference community     |
| bc_get_info                  | Get information about a community profile (samples, members or file format) |
| bc_manage_samples            | Include, delete, merge, sort or rename samples                              |
| bc_measure_alpha             | Measure $\alpha$ diversity of communities                                   |
| bc_measure_beta              | Measure $\beta$ diversity between communities                               |
| bc_rarefy                    | Rarefy communities                                                          |
| bc_relative_to_absolute      | Convert relative abundances into absolute abundance                         |
| bc_remove_unexpected_members | Remove members not expected to occur, based on a reference community        |
| bc_summarize                 | Summarize community composition at different taxonomic levels               |
| bc_use_repr_id               | Replace member ID by that of their OTU cluster or taxonomic representative  |

## REFERENCES

- Angly,F.E. *et al.* (2009) The GAAS metagenomic tool and its estimations of viral and microbial average genome size in four major biomes. *PLoS Comput. Biol.*, **5**, e1000593.
- Angly,F.E. *et al.* (2006) The marine viromes of four oceanic regions. *PLoS Biol.*, **4**, e368.
- Berger,W.H. and Parker,F.L. (1970) Diversity of planktonic foraminifera in deep-sea sediments. *Science*, **168**, 1345–134.
- Bray,J.R. and Curtis,J.T. (1957) An ordination of the upland forest communities of Southern Wisconsin. *Ecol. Monogr.*, **27**, 326–349.
- Brillouin,L. (1962) *Science and information theory* Academic Press, New York.
- Buzas,M.A. and Gibson,T.G. (1969) Species diversity: benthonic Foraminifera in western North Atlantic. *Science*, **163**, 72–75.
- Camargo,J.A. (1993) Must dominance increase with the number of subordinate species in competitive interactions ? *J. Theor. Biol.*, **161**, 537–542.
- Caporaso,J.G. *et al.* (2010) QIIME allows analysis of high-throughput community sequencing data. *Nat. Methods*, **7**, 335–336.
- Chao,A. (1984) Nonparametric estimation of the number of classes in a population. *Scand. J. Stat.*, **11**, 265–270.
- Chazdon,R.L. *et al.* (1998) Statistical methods for estimating species richness of woody regeneration in primary and secondary rain forests of Northeastern Costa Rica.
- Heip,C. (1974) A new index measuring evenness. *J. Mar. Biol. Assoc. U. K.*, **54**, 555–557.
- Hellinger,E. (1909) Neue Begründung der Theorie quadratischer Formen von unendlich vielen Veränderlichen. *J. Für Reine Angew. Math.*, **136**, 210–271.
- Hill,M.O. (1973) Diversity and evenness: a unifying notation and its consequences. *Ecology*, **54**, 427–432.
- Horn,H.S. (1966) Measurement of ‘overlap’ in comparative ecological studies. *Am. Nat.*, **100**, 419–424.
- Jaccard,P. (1901) Étude comparative de la distribution florale dans une portion des Alpes et des Jura. *Bull. Société Vaudoise Sci. Nat.*, **37**, 547–579.
- Lozupone,C. *et al.* (2006) UniFrac - An online tool for comparing microbial community diversity in a phylogenetic context. *BMC Bioinformatics*, **7**, 371.
- Margalef,R. (1957) The theory of information in ecology. *Gen. Syst. Bull.*, **3**, 36–71.
- McDonald,D. *et al.* (2012) The Biological Observation Matrix (BIOM) format or: how I learned to stop worrying and love the ome-ome. *GigaScience*, **1**, 7.
- McIntosh,R.P. (1967) An index of diversity and the relation of certain concepts to diversity. *Ecology*, **48**, 392.
- Menhinick,E.F. (1964) A comparison of some species-individuals diversity indices applied to samples of field insects. *Ecology*, **45**, 859.
- Pielou,E.C. (1975) *Ecological diversity* Wiley, New York.
- Shannon,C.E. and Weaver,W. (1963) *The mathematical theory of communication* Univ of Illinois Press, Urbana.
- Simpson,E.H. (1949) Measurement of diversity. *Nature*, **163**, 688.
- Sørensen,T.A. (1948) A method of establishing groups of equal amplitude in plant sociology based on similarity of species content, and its application to analyses of the vegetation on Danish commons. *K. Dan. Vidensk. Selsk. Biol. Skr.*, **5**, 1–34.
- Whittaker,R.H. (1972) Evolution and measurement of species diversity. *Taxon*, **21**, 213–251.
